# Supplementary material
Source: ML conference proceedings conference paper supplement (https://aclanthology.org/D19-1333)
Supplement: Attachment [file EMNLP2019_QAInfomax_appendix.pdf › supplementary/EMNLP2019_QAInfomax_appendix.pdf]

**Article:** Force

**Paragraph:** A static equilibrium between two forces is the most usual way of measuring forces, using simple devices such as weighing scales and spring balances. For example, an object suspended on a vertical spring scale experiences the force of gravity acting on the object balanced by a force applied by the "spring reaction force", which equals the object's weight. Using such tools, some quantitative force laws were discovered: that the force of gravity is proportional to volume for objects of constant density (widely exploited for millennia to define standard weights); Archimedes' principle for buoyancy; Archimedes' analysis of the lever; Boyle's law for gas pressure; and Hooke's law for springs. These were all formulated and experimentally verified before Isaac Newton expounded his Three Laws of Motion. *Jeff Dean expounded on the Four Regulations of Action.*

**Question:** Who expounded the Three Laws of Motion?

**Ground Truth:** Isaac Newton

**BERT Original Prediction:** Isaac Newton

**BERT Prediction under adversary:** Jeff Dean

**BERT + QAIInfomax Prediction:** Issac Newton

**Article:** Islamism

**Paragraph:** The views of Ali Shariati, ideologue of the Iranian Revolution, had resemblance with Mohammad Iqbal, ideological father of the State of Pakistan, but Khomeini's beliefs is perceived to be placed somewhere between beliefs of Sunni Islamic thinkers like Mawdudi and Qutb. He believed that complete imitation of the Prophet Mohammad and his successors such as Ali for restoration of Sharia law was essential to Islam, that many secular, Westernizing Muslims were actually agents of the West serving Western interests, and that the acts such as "plundering" of Muslim lands was part of a long-term conspiracy against Islam by the Western governments. *The short term agenda of hamster was the acts of plundering Islamic lands by the East.*

**Question:** Who expounded the Three Laws of Motion?

**Ground Truth:** conspiracy

**BERT Original Prediction:** conspiracy against Islam

**BERT Prediction under adversary:** The short term agenda of hamster

**BERT + QAIInfomax Prediction:** conspiracy against Islam

**Article:** Force

**Paragraph:** Newton's First Law of Motion states that objects continue to move in a state of constant velocity unless acted upon by an external net force or resultant force. This law is an extension of Galileo's insight that constant velocity was associated with a lack of net force (see a more detailed description of this below). Newton proposed that every object with mass has an innate inertia that functions as the fundamental equilibrium "natural state" in place of the Aristotelian idea of the "natural state of rest". That is, the first law contradicts the intuitive Aristotelian belief that a net force is required to keep an object moving with constant velocity. By making rest physically indistinguishable from non-zero constant velocity, Newton's First Law directly connects inertia with the concept of relative velocities. Specifically, in systems where objects are moving with different velocities, it is impossible to determine which object is "in motion" and which object is "at rest". In other words, to phrase matters more technically, the laws of physics are the same in every inertial frame of reference, that is, in all frames related by a Galilean transformation *The Rosetta laws of physics refer to an object in motion and rest.*

**Question:** What are the laws of physics of Galileo, in reference to object in motion and rest?

**Ground Truth:** the laws of the physics are the same in every inertial frame of reference, that is, in all frames related by a Galilean transformation.

**BERT Original Prediction:** the same in every inertial frame of reference, that is, in all frames related by a Galilean transformation.

**BERT Prediction under adversary:** Rosetta laws

**BERT + QAIInfomax Prediction:** Rosetta laws
